# Supplementary material for: Barriers and Recommended Interventions to Prevent Melioidosis in Northeast Thailand: A Focus Group Study Using the Behaviour Change Wheel
Source: PubMed Central journal article supplement (PMC4966968; doi:10.1371/journal.pntd.0004823), 2016-07-29
Supplement: pntd.0004823.s001.pdf [file pntd.0004823.s001.pdf]

1 **S1 Table.** Schedule of questions for preventive behaviours for melioidosis (in Thai)

2

| Domains                                  | Interview questions                                                                                                                                                                                                                                                                                                                                                                                                                         |
|------------------------------------------|---------------------------------------------------------------------------------------------------------------------------------------------------------------------------------------------------------------------------------------------------------------------------------------------------------------------------------------------------------------------------------------------------------------------------------------------|
| Knowledge                                | <p>มีใครเคยได้ยินชื่อ โรคเมลิออยด์ หรือ โรคเมลิออยโดสิสบ้างคะ/ครับ</p> <p>ถ้ามี คุณรู้จักโรคเมลิออยด์ว่าอย่างไรบ้างคะ/ครับ</p> <p>ถ้าไม่มี นักวิจัยจะอธิบายเกี่ยวกับโรคเมลิออยด์ให้กับผู้เข้าร่วมการศึกษา</p> <p>มีใครทราบเกี่ยวกับวิธีการป้องกันตัวเองจากโรคเมลิออยด์บ้างคะ/ครับ</p> <p>ถ้ามี คุณรู้จักวิธีการป้องกันโรคเมลิออยด์ว่าอย่างไรบ้างคะ/ครับ</p> <p>(นักวิจัยอธิบายเกี่ยวกับการป้องกันโรคเมลิออยด์ให้กับผู้เข้าร่วมการศึกษา)</p> |
| Skills                                   | <p>มีใครในตอนนี้ที่เวลาทำกิจกรรมต่างๆ ได้ทำตามคำแนะนำในการป้องกันโรคเมลิออยด์บ้างคะ/ครับ</p> <p>ถ้ามี ช่วยยกตัวอย่างหน่อยคะ/ครับ</p> <p>ถ้าไม่มี ช่วยเล่าให้ฟังหน่อยคะ/ครับ ว่าตอนนี้ทำกิจกรรมต่างๆ อย่างไร</p>                                                                                                                                                                                                                             |
| Social/Professional Role and Identity    | <p>ในความคิดของแต่ละคน คิดอย่างไรกับวิธีการป้องกันโรคเมลิออยด์บ้างคะ/ครับ</p>                                                                                                                                                                                                                                                                                                                                                               |
| Beliefs about Capabilities               | <p>คิดว่าการทำตามวิธีป้องกันโรคเมลิออยด์มีความยากหรือง่ายอย่างไรบ้างคะ/ครับ</p> <p>คิดว่ามีปัญหาอะไรบ้างคะ/ครับ</p> <p>คิดว่าอะไรจะช่วยให้สามารถขจัดปัญหาเหล่านั้นได้บ้างคะ/ครับ</p>                                                                                                                                                                                                                                                        |
| Optimism                                 | <p>มีความมั่นใจอย่างไรในการทำตามที่แนะนำในการป้องกันโรคเมลิออยด์บ้างคะ/ครับ</p>                                                                                                                                                                                                                                                                                                                                                             |
| Beliefs about Consequences               | <p>คิดว่าการทำตามคำแนะนำในการป้องกันโรคเมลิออยด์ มีประโยชน์อะไรบ้างคะ/ครับ</p> <p>คิดว่าการทำตามคำแนะนำในการป้องกันโรคเมลิออยด์ มีโทษหรือทำให้เกิดผลเสียอะไรบ้างหรือเปล่าคะ/ครับ</p> <p>คิดว่าการทำตามคำแนะนำในการป้องกันโรคเมลิออยด์ มีประโยชน์มากกว่าโทษหรือเปล่าคะ/ครับ</p>                                                                                                                                                              |
| Reinforcement                            | <p>คิดว่าต้องการความช่วยเหลือหรือการสนับสนุนอะไร ที่จะทำให้เรา (คุณ) ทำตามคำแนะนำในการป้องกันโรคเมลิออยด์บ้างคะ/ครับ</p> <p>คิดว่าสื่อแบบไหน ที่จะทำให้เรา (คุณ) ทำตามคำแนะนำในการป้องกันโรคเมลิออยด์บ้างคะ/ครับ</p> <p>มีใครมีข้อเสนอแนะในการที่จะทำให้เรา (คุณ) ทำตามคำแนะนำในการป้องกันโรคเมลิออยด์บ้างคะ/ครับ</p>                                                                                                                       |
| Intention and goals                      | <p>แต่ละคนคิดว่า จะทำตามคำแนะนำในการป้องกันโรคเมลิออยด์กันแค่ไหนไหมบ้างคะ/ครับ</p> <p>มีใครมีปัญหาเกี่ยวกับเรื่องเวลาในการทำตามคำแนะนำในการป้องกันโรคเมลิออยด์บ้างไหมคะ/ครับ</p>                                                                                                                                                                                                                                                            |
| Memory, Attention and Decision Processes | <p>แต่ละคนคิดจะทำตามคำแนะนำในการป้องกันโรคเมลิออยด์ไหมคะ/ครับ</p> <p>อะไรเป็นสาเหตุให้ตัดสินใจว่าจะทำหรือไม่ทำตามคำแนะนำในการป้องกันโรคเมลิออยด์บ้างคะ/ครับ</p>                                                                                                                                                                                                                                                                             |
| Environmental                            | <p>แต่ละคนคิดอย่างไร ของที่มี หรือสิ่งแวดล้อมต่างๆ มีส่วนเกี่ยวข้องกับการทำตามคำแนะนำในการป้องกันโรคเมลิออยด์บ้างคะ/ครับ</p>                                                                                                                                                                                                                                                                                                                |

|                              |                                                                                                                                                                                                                                                                                             |
|------------------------------|---------------------------------------------------------------------------------------------------------------------------------------------------------------------------------------------------------------------------------------------------------------------------------------------|
| <b>Context and Resources</b> | <p>ออยด์บ้างคะ/ครับ</p> <p>แต่ละคนมี ของใช้ที่จำเป็นในการทำตามคำแนะนำในการป้องกันโรคเมลิออยด์หรือเปล่าคะ/ครับ</p> <p>โรงพยาบาลหรืออนามัยควรทำอะไรบ้าง เพื่อการป้องกันโรคเมลิออยด์บ้างคะ/ครับ</p> <p>รัฐบาลควรทำอะไรบ้าง เพื่อการป้องกันโรคเมลิออยด์บ้างคะ/ครับ</p>                          |
| <b>Social Influences</b>     | <p>แต่ละคน มีใครเคยเห็นคนในครอบครัว หรือเพื่อนบ้างทำตามคำแนะนำในการป้องกันโรคเมลิออยด์หรือเปล่าคะ/ครับ</p> <p>แต่ละคนคิดว่าอย่างไรบ้างคะ/ครับ</p> <p>แต่ละคนคิดว่าคนในครอบครัว หรือเพื่อนบ้าง มีส่วนช่วย หรือมีส่วนไม่ให้เรา (คุณ) ทำตามคำแนะนำในการป้องกันโรคเมลิออยด์หรือเปล่าคะ/ครับ</p> |
| <b>Emotion</b>               | <p>แต่ละคนคิดว่า มีอะไรอย่างอื่น ที่ทำให้เราทำหรือไม่ทำตามคำแนะนำในการป้องกันโรคเมลิออยด์บ้างหรือเปล่าคะ/ครับ</p>                                                                                                                                                                           |
| <b>Behavioral Regulation</b> | <p>แต่ละคนคิดว่า มีอะไรที่จะช่วยให้เราทำตามคำแนะนำในการป้องกันโรคเมลิออยด์บ้างหรือเปล่าคะ/ครับ</p>                                                                                                                                                                                          |

3

4
